# Supplementary material for: Insight into Structural Characteristics of Protein-Substrate Interaction in Pimaricin Thioesterase
Source: MDPI journal article supplement (doi:10.3390/ijms20040877), 2019-02-18
Supplement: s1 [file s1]

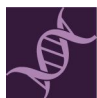

1 Supporting Information

## 2 Insight into Structural Characteristics of 3 Protein-Substrate Interaction in Pimaricin 4 Thioesterase

5 Shuobing Fan <sup>1</sup>, Rufan Wang <sup>1</sup>, Chen Li <sup>1</sup>, Linquan Bai <sup>1</sup>, Yi-Lei Zhao <sup>1</sup>, Ting Shi <sup>1,\*</sup>

6 <sup>1</sup> State Key Laboratory of Microbial Metabolism, Joint International Research Laboratory of Metabolic and  
7 Developmental Sciences, School of Life Sciences and Biotechnology, Shanghai Jiao Tong University,  
8 Shanghai 200240, China

9 \* Correspondence: tshi@sjtu.edu.cn; Tel/Fax: +86-21-34207347

10 Received: date; Accepted: date; Published: date

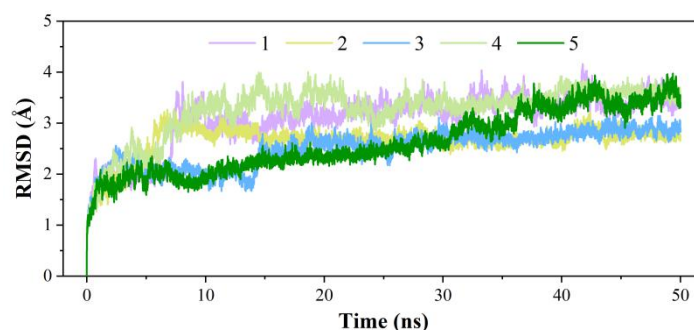

11

12

**Figure S1.** RMSD of five pima-TE simulations with the first frame as a reference.

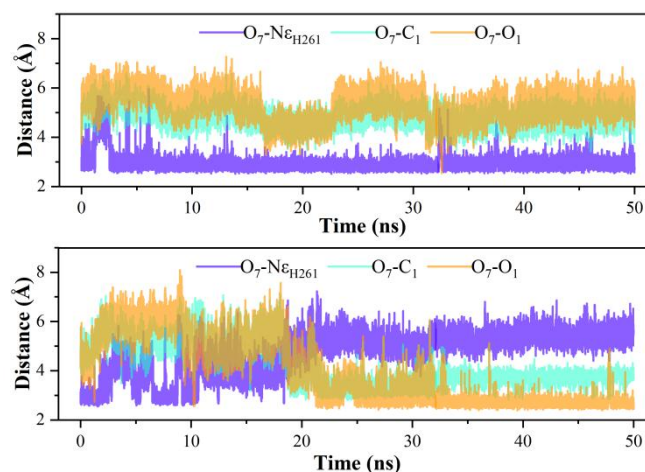

13

14 **Figure S2.** Distances  $O_7-N_{\epsilon H261}$ ,  $O_7-C_1$  and  $O_7-O_1$  in wild type trajectory md4 and md1  
15 colored in purple, cyan and yellow, respectively.

16

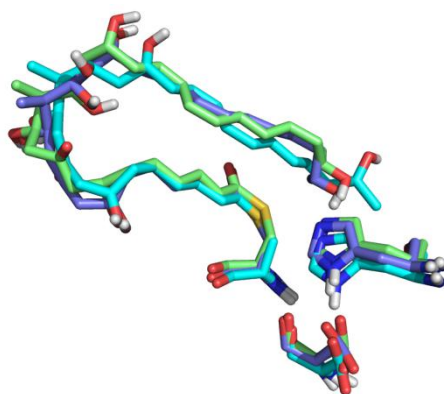

17

18

**Figure S3.** Dominant polyketide chain structure in S138C md1-3.

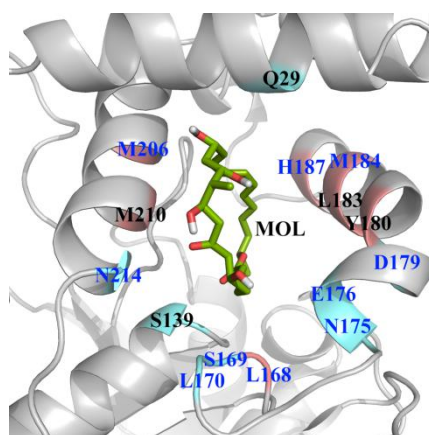

19

20

21

22

23

**Figure S4.** Positional distribution of residues contributing to VDW (light blue) or electrostatic (salmon) forces in protein-product interactions. Residues labeled in black indicated those identical as polyketide chain system, while newly-emerged ones labeled in blue.

24

**Table S1.** Proportion of PRS formation in wild type and mutated trajectories.

| Category            | Traj. No. | PRS Proportion | Average |
|---------------------|-----------|----------------|---------|
| wild type<br>(50ns) | 1         | 0.65%          | 4.37%   |
|                     | 2         | 0.06%          |         |
|                     | 3         | 1.58%          |         |
|                     | 4         | 18.80%         |         |
|                     | 5         | 0.74%          |         |
| Q29A<br>(30ns)      | 1         | 0.29%          | 0.54%   |
|                     | 2         | 1.19%          |         |
|                     | 3         | 0.15%          |         |
| M210G<br>(30ns)     | 1         | 0.11%          | 0.72%   |
|                     | 2         | 2.02%          |         |
|                     | 3         | 0.03%          |         |

|                 |   |        |        |
|-----------------|---|--------|--------|
| R186F<br>(30ns) | 1 | 0.54%  |        |
|                 | 2 | 1.71%  | 1.64%  |
|                 | 3 | 2.68%  |        |
| R186Y<br>(30ns) | 1 | 2.40%  |        |
|                 | 2 | 10.19% | 18.14% |
|                 | 3 | 41.84% |        |
| S138C<br>(50ns) | 1 | 1.76%  |        |
|                 | 2 | 0.02%  | 0.60%  |
|                 | 3 | 0.02%  |        |

25

**Table S2.** Proportion of hydrogen bond E80-R266 formation.

| Category            | Traj. No. | Proportion of hydrogen bond (E80-R266) | Average Proportion |
|---------------------|-----------|----------------------------------------|--------------------|
| wild type<br>(50ns) | 1         | 23.54%                                 |                    |
|                     | 2         | 6.28%                                  |                    |
|                     | 3         | 31.21%                                 | 35.71%             |
|                     | 4         | 50.31%                                 |                    |
|                     | 5         | 67.22%                                 |                    |
| R186F<br>(30ns)     | 1         | 49.65%                                 |                    |
|                     | 2         | 12.11%                                 | 24.35%             |
|                     | 3         | 11.29%                                 |                    |

26

**Table S3.** Proportion of hydrogen bond E80-R/Y186 formation.

| Category            | Traj. No. | Proportion of hydrogen bond E80-R/Y186 |
|---------------------|-----------|----------------------------------------|
| wild type<br>(50ns) | 1         | 6.59%                                  |
|                     | 2         | 4.72%                                  |
|                     | 3         | 57.72%                                 |
|                     | 4         | 56.54%                                 |
|                     | 5         | 49.60%                                 |
| R186Y<br>(30ns)     | 1         | 4.49%                                  |
|                     | 2         | 0.09%                                  |
|                     | 3         | 19.03%                                 |

27
